# Supplementary material for: Drivers of the fungal spore bioaerosol budget: observational analysis and global modeling
Source: Copernicus journal article supplement (doi:10.5194/acp-21-4381-2021), 2021-03-22
Supplement: Supplementary file 1 [file acp-21-4381-2021-supplement.pdf]

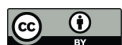

*Supplement of*

## **Drivers of the fungal spore bioaerosol budget: observational analysis and global modeling**

**Ruud H. H. Janssen et al.**

*Correspondence to:* Ruud H. H. Janssen ([ruud.janssen@tno.nl](mailto:ruud.janssen@tno.nl)) and Colette L. Heald ([heald@mit.edu](mailto:heald@mit.edu))

The copyright of individual parts of the supplement might differ from the article licence.

**Table S1: global emissions, burden and lifetime for the population and statistical model for two sensitivity runs**

| <b>Emission scheme</b>   | <b>Simulation</b> | <b>Emission (Tg year-1)</b> | <b>Burden (Gg)</b> | <b>Lifetime (days)</b> |
|--------------------------|-------------------|-----------------------------|--------------------|------------------------|
| <b>Population model</b>  | DILFACT0.3        | 2.7                         | 15.8               | 2.1                    |
| <b>Statistical model</b> | DILFACT0.3        | 2.9                         | 12.0               | 1.4                    |
| <b>Population model</b>  | RAINOUT0          | 3.4                         | 25.6               | 2.9                    |
| <b>Statistical model</b> | RAINOUT0          | 3.7                         | 20.0               | 2.1                    |

**Table S2: normalization factors of the FBAP measurements for each campaign. We applied min-max normalization, which scales all values to a range between 0 and 1.**

| <b>Campaign</b> | <b>Normalization factor</b> |
|-----------------|-----------------------------|
| Germany         | $9.6 \times 10^{-3}$        |
| Finland         | 0.014                       |
| Colorado        | 0.019                       |
| Ideas           | 0.095                       |
| SEAC4RS         | $3.6 \times 10^{-3}$        |
| NAAMES 2015     | 0.15                        |
| NAAMES 2016     | 0.048                       |
| NAAMES 2017     | 0.12                        |

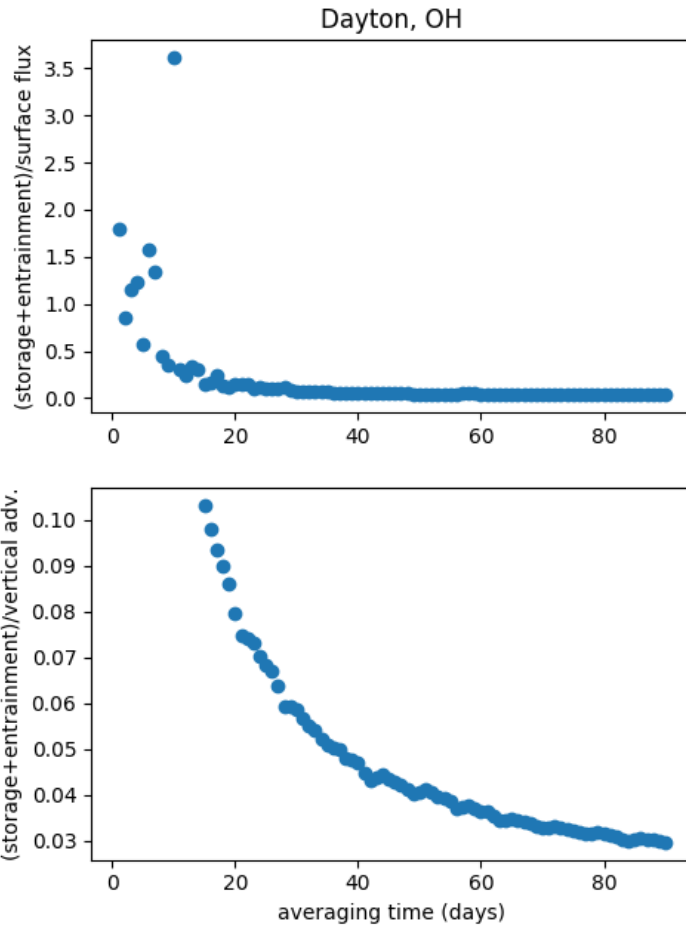

Figure S1: ratio of storage+entrainment vs. the net surface flux and vertical advection for different averaging times

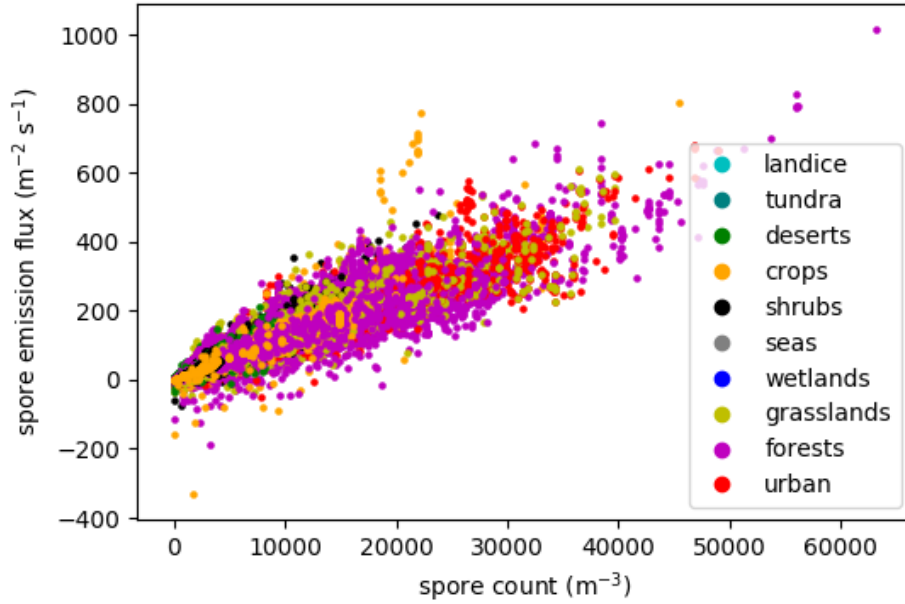

Figure S2: relationship between spore counts and derived emissions for different land use types. Each point represents a daily spore count at a single AAAAI station

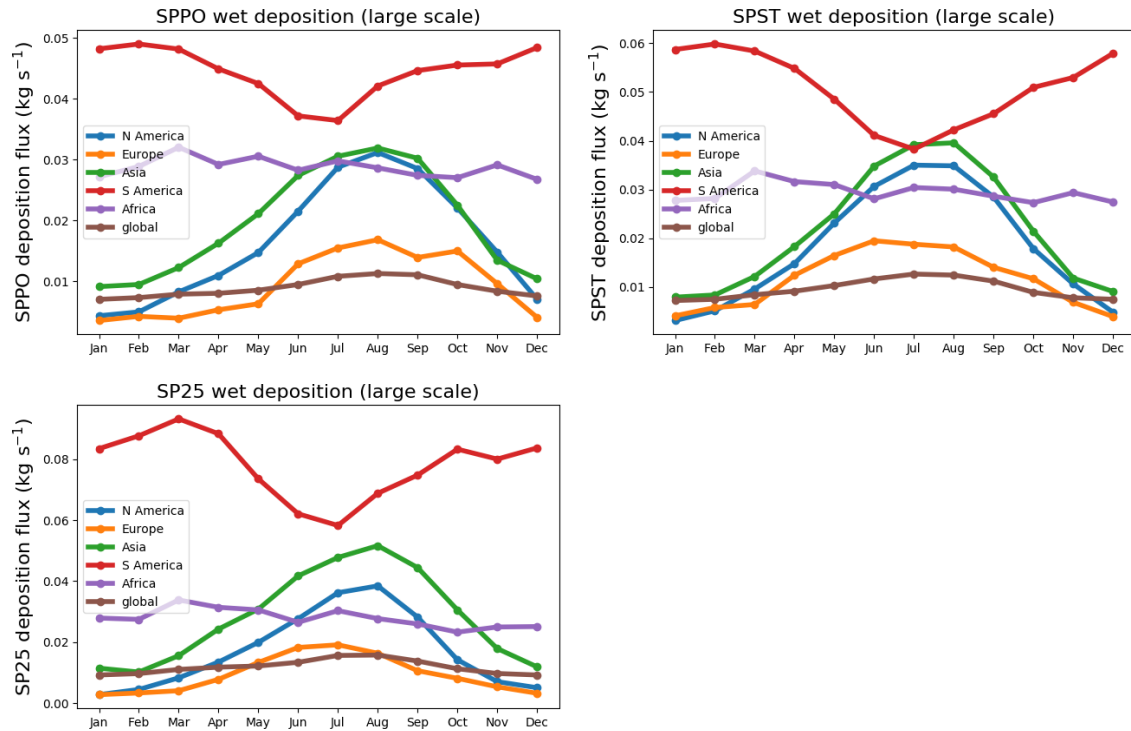

Figure S3: Seasonal cycles of fungal spore wet deposition in GEOS-Chem simulations for the statistical, the population and the HS09 model. Note the different scales on the y-axis

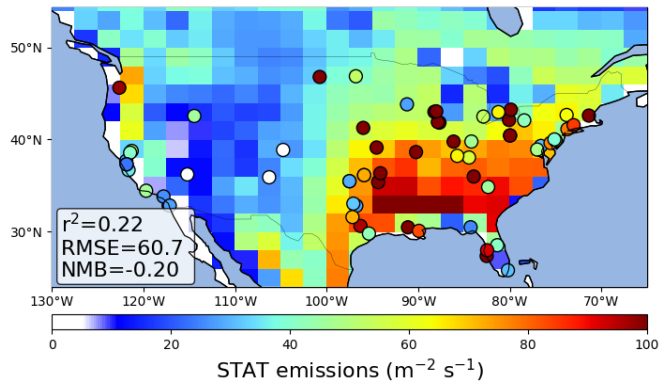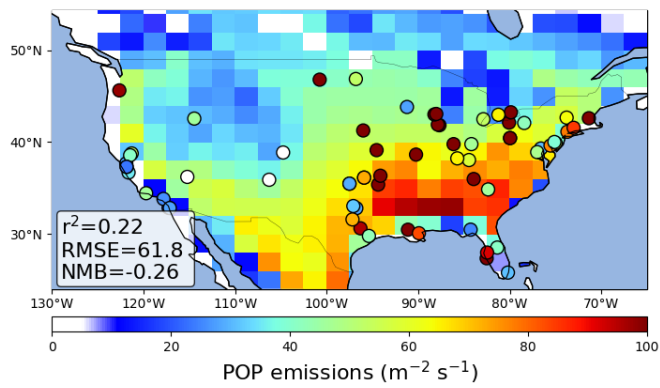

**Figure S4: Comparison of GEOS-Chem simulated (CTRL simulation) emission fluxes of fungal spores to emission fluxes derived from AAAAI observations for the statistical model (top) and the population model (bottom). Statistics describing the comparisons are shown inset.**

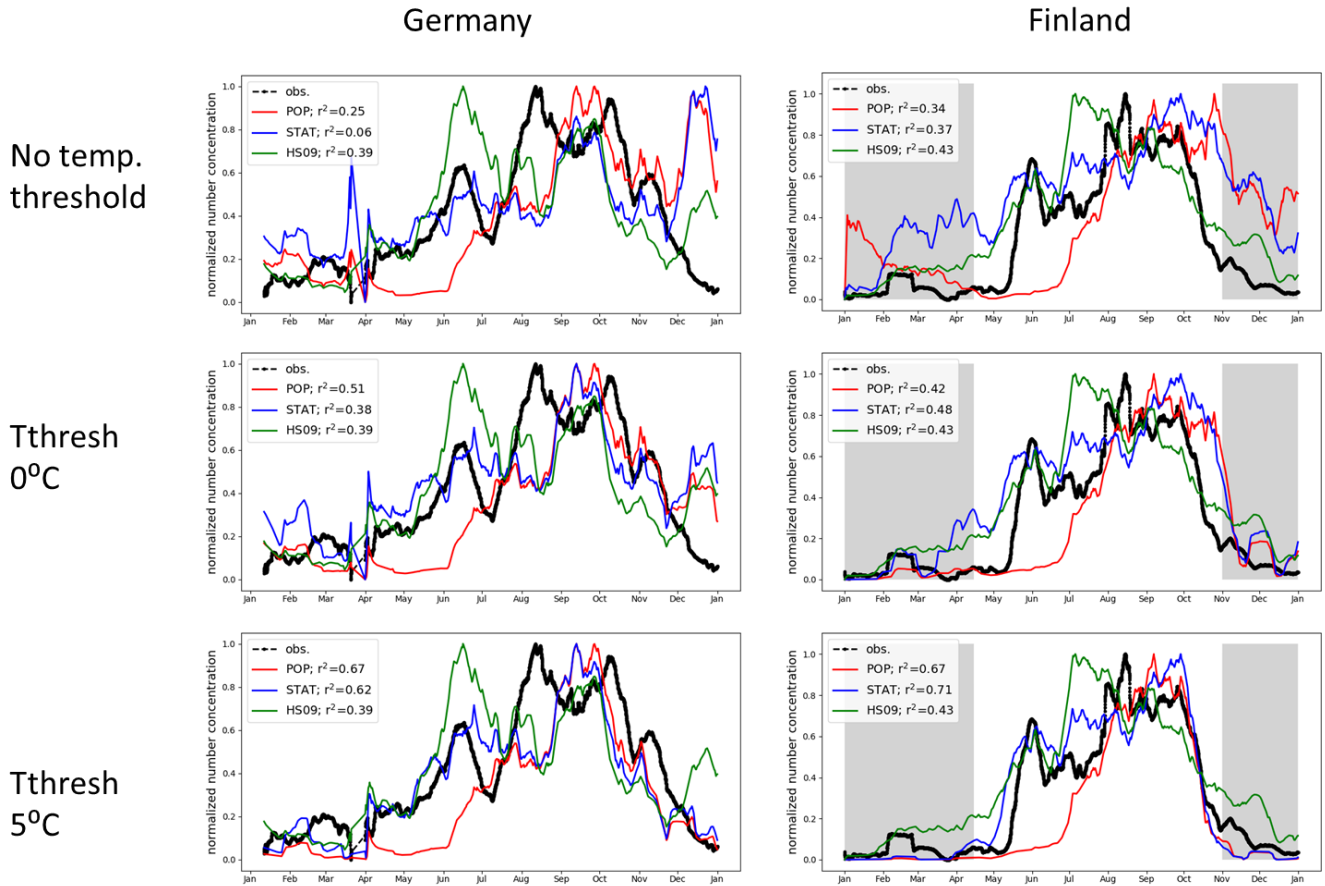

**Figure S5: sensitivity to chosen temperature threshold of modeled spore concentrations at the sites in Germany and Finland. No temperature threshold (top), threshold of 0°C (middle) and threshold of 5°C (bottom)**
